# Supplementary material for: Comparison of HINT-8 and EQ-5D-5L for assessing Health-Related Quality of Life in patients with precancerous cervical lesions
Source: Research Square preprint supplement (doi:10.21203/rs.3.rs-7158813/v1), 2025-08-21
Supplement: Supplementary file 1 [file 1cce495ebb8fc135dee767a9.docx]

Additional file 2.

**Sample Size Adequacy Justification for Comparing EQ-5D-5L and HINT-8 in CIN/CIS Patients**

This document provides a unified narrative justification for the sample size of 80 participants in our study comparing the EQ-5D-5L and HINT-8 instruments to assess health-related quality of life (HRQoL) among women diagnosed with cervical intraepithelial neoplasia (CIN) or carcinoma in situ (CIS). Ensuring methodological transparency in sample size determination is critical for the reliability and validity of psychometric research.

**1. Study Design and Primary Analyses**

This cross-sectional, multicenter study was conducted from August 2023 to February 2024 across 12 tertiary hospitals in Korea. The study enrolled 80 women diagnosed with CIN or CIS. The methodological approach included:

- **Correlation analysis (Pearson’s r)**
- **Agreement analysis (Intraclass Correlation Coefficient, ICC)**
- **Reliability analysis (Cronbach’s alpha)**
- **Bland-Altman analysis**
- **Group comparisons (Mann-Whitney U, Kruskal-Wallis tests)**

This multicenter design was intended to maximize the generalizability and external validity of the findings.

**2. Sample Size Calculation Rationale**

**2-1. Correlation Analysis**

The primary consideration in determining the sample size was the requirement for robust correlation analysis between the two HRQoL instruments. The target was to detect a correlation coefficient of r ≥ 0.7 (indicative of a large effect) using a significance level (α) of 0.05 (two-sided) and statistical power of 80%. According to Cohen’s guidelines, detecting a large effect (r = 0.5) requires a minimum of 29 subjects, while a very large effect (r = 0.7) requires only 13 subjects (1). In this study, an observed correlation of r = 0.792 was achieved, confirming that a sample size of 80 provides well over 99% power and is more than sufficient for this type of analysis.

**2-2. Reliability Analysis (Cronbach’s Alpha)**

For reliability analysis using Cronbach’s alpha, several recognized standards for psychometric validation studies were applied (2, 3):

- A minimum of 50 participants is generally recommended.
- A sample size of approximately 100 is considered appropriate for typical studies.
- For greater precision, over 200 participants may be preferred.
- For basic reliability verification, 50–100 participants is a commonly cited range, with 100–200 as the preferred range.

Thus, the sample size of 80 is regarded as adequate for estimating Cronbach’s alpha and aligns well with standard recommendations for basic reliability assessment.

**2-3. Agreement Analysis (ICC)**

To estimate the intraclass correlation coefficient (ICC), the following criteria guided the sample size (4):

- An expected ICC value of 0.80, representing excellent agreement.
- A confidence interval width of 0.3 or less at the 95% level.
- A minimum of 30 to 50 participants typically required to achieve this degree of precision.

Therefore, a sample size of 80 ensures adequate precision for ICC analysis and confidently supports the evaluation of agreement between the instruments.

**3. Statistical Power Analysis**

The statistical power analysis confirmed the adequacy of the chosen sample size for key study aims:

- **Correlation analysis:** With an observed r = 0.792, the analysis had more than 99% power.
- **Group comparisons (e.g., marital status subgroups):** For the division between married (n=38) and unmarried (n=42) participants, the power was approximately 60–70% for detecting medium effects and 80–90% for large effects.
- **Reliability analysis (Cronbach’s alpha for HINT-8 = 0.859):** The 95% confidence interval was 0.10–0.15, indicating acceptable precision.
- **Effect size considerations:** A small to medium effect size (Cohen’s d = 0.373) was observed; detecting a medium effect (d=0.5) would require roughly 64 subjects per group.

**4. Adequacy of Sample Size by Analysis Type**

| **Analysis Type** | **Required N** | **Actual N** | **Adequacy** |
| --- | --- | --- | --- |
| Correlation | 13–29 | 80 | Sufficient |
| ICC | 30–50 | 80 | Sufficient |
| Reliability (Cronbach’s α) | 50–100 | 80 | Adequate |
| Group comparison | 64–128 | 80 | Adequate |
| Ceiling effect analysis | 30–50 | 80 | Sufficient |

The inclusion of 12 tertiary hospitals across different regions of Korea adds further weight to the external validity and generalizability of the study findings.

The sample size of 80 participants is well justified based on established guidelines for psychometric validation and comparative studies of HRQoL instruments. It confers sufficient power and precision for the study’s primary objectives, including correlation, agreement, and reliability analyses. Although larger samples would enable more detailed subgroup analyses and reduce statistical uncertainty, the present sample is in line with international standards for comparable research. The multicenter approach adopted in this study enhances both the representativeness and external validity of the results.

**5. Reference**

1. Bujang MA, Baharum N. Sample size guideline for correlation analysis. World. 2016;3(1):37-46.

2. Gunawan J, Marzilli C, Aungsuroch Y. Establishing appropriate sample size for developing and validating a questionnaire in nursing research. Belitung Nursing Journal. 2021;7(5):356.

3. Rouquette A, Falissard B. Sample size requirements for the internal validation of psychiatric scales. International journal of methods in psychiatric research. 2011;20(4):235-49.

4. Han O, Tan HW, Julious S, Sutton L, Jacques R, Lee E, et al. A descriptive study of samples sizes used in agreement studies published in the PubMed repository. BMC medical research methodology. 2022;22(1):242.
