# Supplementary material for: Comparison of HINT-8 and EQ-5D-5L for assessing Health-Related Quality of Life in patients with precancerous cervical lesions
Source: Research Square preprint supplement (doi:10.21203/rs.3.rs-7158813/v1), 2025-08-21
Supplement: Supplementary file 3 [file 5cc201958284858fd76ace19.docx]

Additional File 3.

**Detailed Information on the Development, Scoring, and Psychometric Properties of the HINT-8**

**1. Development**

The Health-related Quality of Life Instrument with 8 Items (HINT-8) was developed to more precisely measure the health-related quality of life (HRQOL) of the Korean population. It was designed in 2014 under the leadership of the Korea Disease Control and Prevention Agency (formerly KCDC), tailored specifically for use in the Korea National Health and Nutrition Examination Survey (KNHANES) (1).

**1-1. Background and Rationale**

While the EQ-5D-3L, a widely used international standard tool, has the advantage of simplicity, it also presents several limitations:

- A high ceiling effect (a large proportion of respondents report “no problems” across all items)
- A limited number of expressible health states
- Insufficient reflection of Korean cultural context

These limitations prompted the need for a new HRQOL instrument tailored to the Korean population.

**1-2. Item Development Process**

- A literature review was conducted to explore HRQOL concepts and existing instruments. Of 129 tools reviewed, 34 were selected for in-depth analysis.
- Focus group discussions with the general population and expert consultations were held to derive and refine relevant health domains—namely, physical, mental, social, and positive health dimensions.

Items with overlapping meanings were consolidated, and ease of understanding was considered. This process led to a refined list of 69 candidate items.

**1-3. Pilot Survey and Item Reduction**

- A pilot survey including 30 items was administered to 892 adults sampled nationwide.
- Items were analyzed based on response distributions, discriminative ability, exploratory factor analysis, and regression analysis to assess explanatory power for the Visual Analogue Scale (VAS) and Self-Rated Health (SRH).
- Based on these analyses, 8 final items with the highest explanatory power were selected.

**1-4. Final Item Composition**

The final version of HINT-8 consists of the following 8 items:

1. Climbing stairs
2. Pain
3. Vitality
4. Work
5. Depression
6. Memory
7. Sleep
8. Happiness

**2. Scoring Method**

The HINT-8 produces health state profiles (e.g., "11111111" for perfect health), based on responses to the 8 items. Each item has 4 response levels (1 = no problem to 4 = severe problem), resulting in 4⁸ (65,536) possible combinations.

For analysis, each response is converted to a 0–100 scale, and an average score is calculated to represent overall health-related quality of life.

The proportion of respondents reporting no problems across all items (i.e., ceiling effect) was only 12.3%, much lower than that of EQ-5D-3L, indicating better discrimination among health statuses (1).

**3. Psychometric Properties**

**3-1. Validity**

**1) Known-Groups Validity**

The HINT-8 demonstrated statistically significant score differences across demographic groups (1):

- Gender: Lower scores in females
- Age: Lower scores in older adults
- Income: Lower scores in lower-income groups
- Education: Lower scores in less-educated individuals

These findings indicate that the instrument reflects known disparities in HRQOL.

Convergent & Discriminant Validity Using the SF-36v2 as a reference: Items related to physical health (e.g., climbing stairs, pain, vitality, working) were more strongly correlated with the Physical Component Summary (PCS) than with the Mental Component Summary (MCS) (|r| = 0.57–0.67 vs. |r| = 0.39–0.45). Items reflecting mental or emotional health (e.g., depression, happiness) were more strongly correlated with the MCS (|r| = 0.43–0.46) than with the PCS (|r| = 0.35–0.45).

These results indicate that each domain in HINT-8 measures its intended construct appropriately.

**2) Convergent & Discriminant Validity**

Using the SF-36v2 as a reference (2):

- Items related to physical health (e.g., climbing stairs, pain, vitality, working) showed stronger correlations with the Physical Component Summary (PCS) (|r| = 0.57–0.67) than with the Mental Component Summary (MCS) (|r| = 0.39–0.45).
- Items reflecting mental or emotional health (e.g., depression, happiness) were more strongly correlated with the MCS (|r| = 0.43–0.46) than with the PCS (|r| = 0.35–0.45).

These results confirm that the HINT-8 appropriately measures its intended health domains.

**3) Additional Evidence from Structural Analysis**

In a subsequent study using a nationally representative sample, confirmatory factor analysis and bifactor modeling further supported the structural validity of the HINT-8 (3). While the tool is essentially unidimensional, secondary groupings into physical and mental domains were also observed. These findings provide strong evidence for the appropriateness of using a single summary score in population-level assessments.

Model fit indices (e.g., CFI, RMSEA), omega hierarchical coefficients, and explained common variance (ECV) supported the dominance of a general factor, confirming that the HINT-8 reliably captures overall health-related quality of life.

**3-2. Reliability**

**1) Test-Retest Reliability**

A subsample of participants (n = 100) completed the HINT-8 twice, 1–2 weeks apart (1):

- Cohen’s Kappa for individual items ranged from 0.565 to 0.799, indicating moderate to substantial agreement
- Intra-class Correlation Coefficient (ICC) for the total score was 0.853, indicating excellent test-retest reliability

These results suggest that the HINT-8 provides consistent measurements over time.

**4. Reference**

1. Lee H, Jo M, Choi S, Kim Y, Oh K. Development and psychometric evaluation of measurement instrument for Korean health-related quality of life. Public Health Wkly Rep. 2016;9(9):447-54.

2. Jo M. Development of the measurement tool for health related quality of life in the Korea National Health and Nutrition Examination Survey. Cheongju: Korea Centers for Disease Control and Prevention. 2014:97.

3. Lee E-H. Internal structure of the Health-Related Quality of Life Instrument with 8-items in a nationally representative population. Journal of Korean Academy of Nursing. 2023;53(3):359-69.
