# Supplementary material for: Comparison of HINT-8 and EQ-5D-5L for assessing Health-Related Quality of Life in patients with precancerous cervical lesions
Source: Research Square preprint supplement (doi:10.21203/rs.3.rs-7158813/v1), 2025-08-21
Supplement: Supplementary file 4 [file fe8bc0e8fc468e058124d71e.docx]

**Additional file 4.** IRB Approval Numbers for Each Institution Participating in the Health-Related Quality of Life Survey for Cervical Cancer Patients

| Hospital | Patients | IRB Number |
| --- | --- | --- |
| Seoul National University Hospital | 5 | 2307-198-1454 |
| Inje University Busan Paik Hospital | 4 | 2023-07-018 |
| CHA Bundang Medical Center | 12 | 2023-08-014 |
| Korea University Ansan Hospital | 7 | 2023AS0208 |
| Konkuk University Medical Center | 4 | KUMC 2023-09-038-001 |
| Severance Hospital | 10 | 4-2023-0719 |
| The Catholic University of Korea Seoul St. Mary's Hospital | 6 | KC23QNDI0625 |
| Ajou University Hospital | 3 | AJOUIRB-SB-2023-433 |
| Hanllym University Kangnam Sacred Heart Hospital | 7 | HKS 2023-08-017 |
| Kyung Hee University Medical Center | 4 | 2023-08-002-006 |
| Korea University Guro Hospital | 0 | 2023GR0339 |
| Hanyang University Seoul Hospital | 18 | 2023-08-009-012 |
