# Supplementary figures and images for: Comparison of HINT-8 and EQ-5D-5L for assessing Health-Related Quality of Life in patients with precancerous cervical lesions
Source: Research Square preprint supplement (doi:10.21203/rs.3.rs-7158813/v1), 2025-08-21

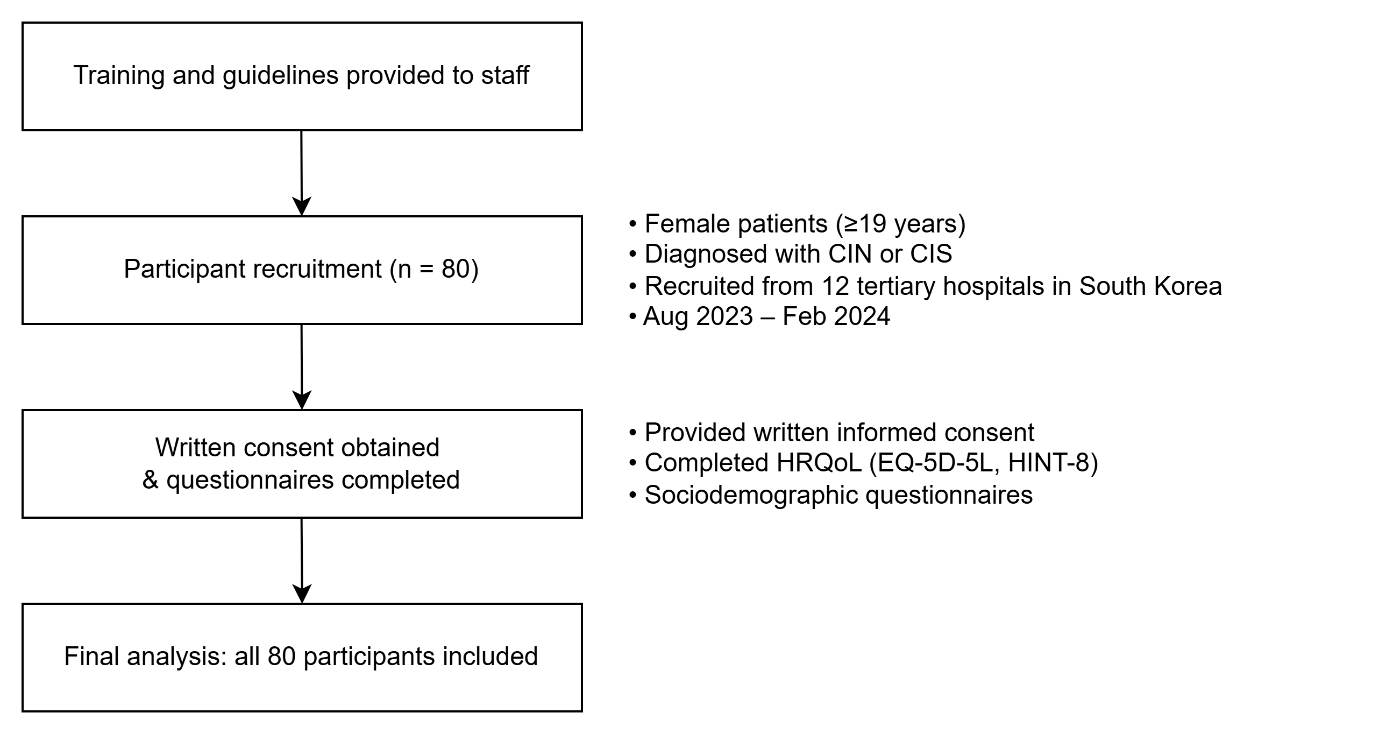


Additional file 1. Participant recruitment and inclusion flowchart

Supplement: Supplementary file 2 [file 45c1221ee5673035753113a2.docx]
